# Supplementary material for: Two-dimensional layered type-II MS2/BiOCl (M = Zr, Hf) van der Waals heterostructures: promising photocatalysts for hydrogen generation
Source: Royal Society of Chemistry journal article supplement (doi:10.1039/d1nj03867b), 2021-01-01
Supplement: d1nj03867b1.pdf [file d1nj03867b1.pdf]

### Electronic Supplementary Information

Two-dimensional layered Type-II  $MS_2/BiOCl$  ( $M = Zr, Hf$ ) van der Waals heterostructures: A promising photocatalysts for hydrogen generation

Francis Opoku,<sup>\*a</sup> Osei Akoto,<sup>a</sup> Samuel Osei-Bonsu Oppong,<sup>b</sup> Anthony Apeke Adimado<sup>a</sup>

<sup>a</sup>Department of Chemistry, Kwame Nkrumah University of Science and Technology, Kumasi, Ghana

<sup>b</sup>Marine Engineering Department, Regional Maritime University, P.O. Box GP 1115, Accra, Ghana

\*Corresponding author: ofrancis2010@gmail.com

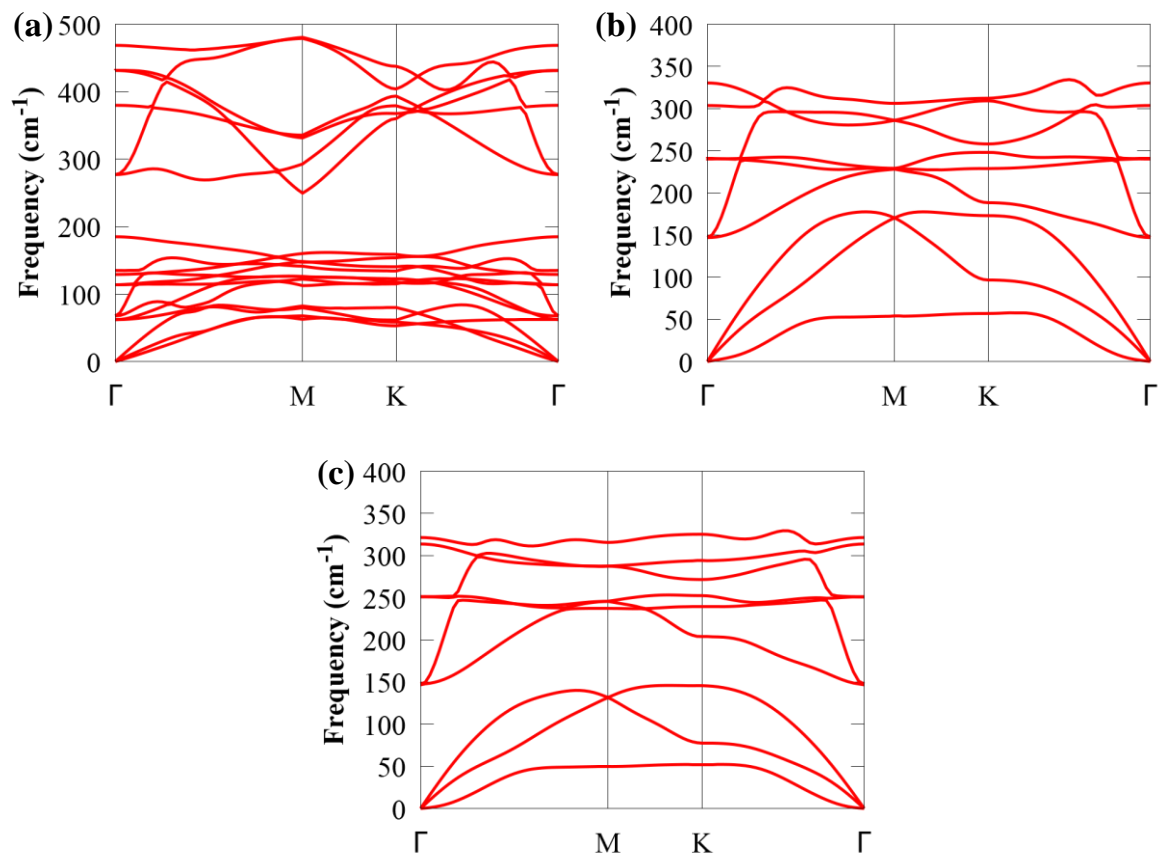

**Figure S1.** The phonon dispersion curve of (a) BiOCl, (b) ZrS<sub>2</sub> and (c) HfS<sub>2</sub>

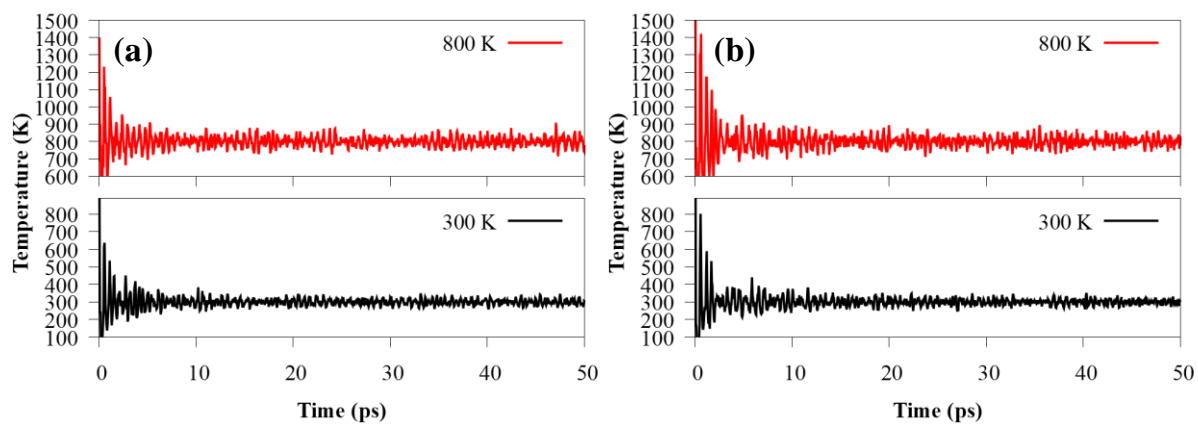

**Figure S2.** Temperature fluctuation of (a) ZrS<sub>2</sub>/BiOCl and (b) HfS<sub>2</sub>/BiOCl at 300 K and 800 K.

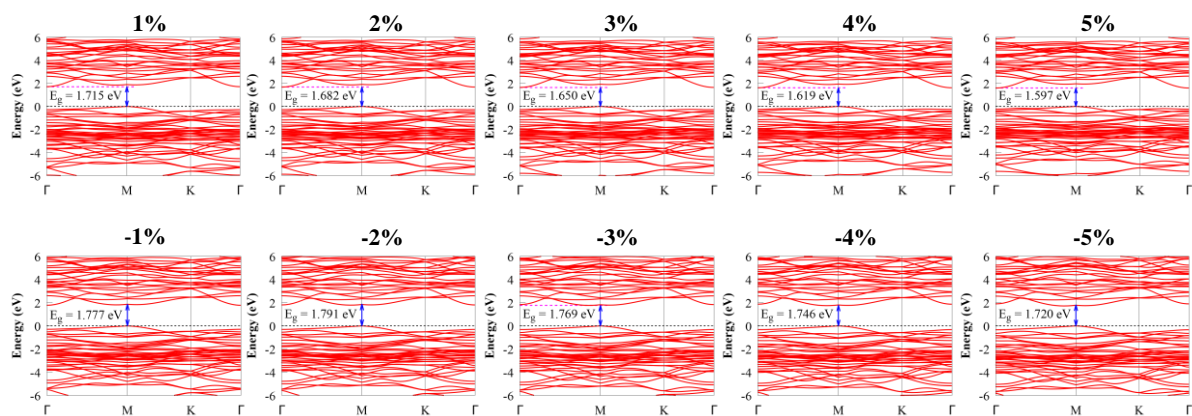

**Figure S3.** The band structure versus strain for ZrS<sub>2</sub>/BiOCl heterostructures

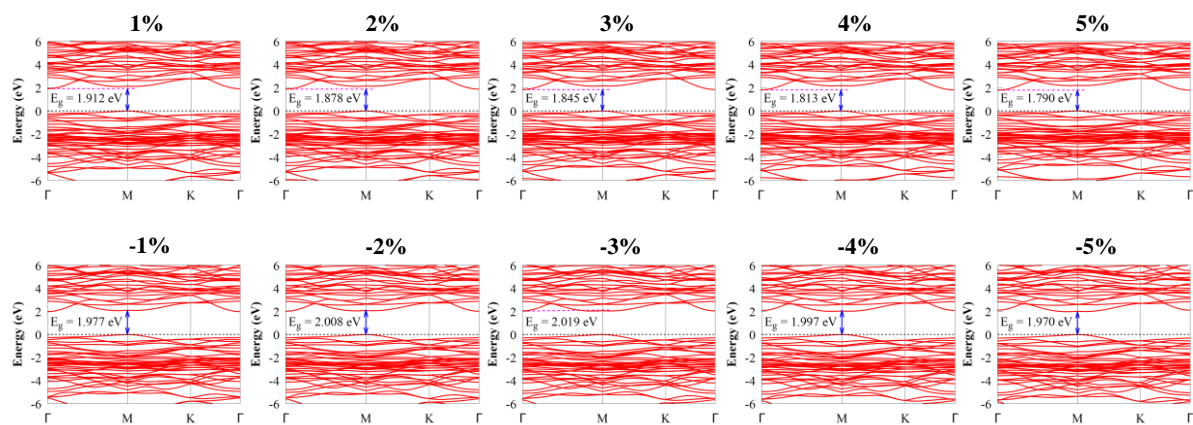

**Figure S4.** The band structure versus strain for HfS<sub>2</sub>/BiOCl heterostructures
